# Supplementary material for: MicroRNA Dysregulation in the Spinal Cord following Traumatic Injury
Source: PLoS One. 2012 Apr 12;7(4):e34534. doi: 10.1371/journal.pone.0034534 (PMC3325277; doi:10.1371/journal.pone.0034534)
Supplement: File S3 — MicroRNA expression changes after spinal cord injury. Excel workbook detailing the changes in microRNA expression after SCI according to parametric (t-student plus FDR adjustment) and non-parametric (Rank Product) methods. The first worksheet shows all significant expression changes of the analyzed microRNAs and comparisons (LS: injury, SH: sham, CT: control). Comparisons as detailed in figure 3A. The second worksheet shows the microRNAs showing significant changes in different comparisons according to both parametric and non-parametric tests. (XLS) [file pone.0034534.s003.xls]

## Sheet: miRNA expression changes
	CTvsLS1		CTvsLS3		CTvsLS7		LS1vsLS7		LS3vsSH3		LS7vsSH7		SH1vsCT	SH3vsCT	SH7vsCT	LS1vsLS3	LS3vsLS7	SH1vsSH3	SH1vsSH7	LS1vsSH1
Name	BH	RP	BH	RP	BH	RP	BH	RP	BH	RP	BH	RP	RP	RP	RP	RP	RP	RP	RP	RP
hsa-miRPlus-F1170		1					2,3(0,005)	1					1			1		1	1	-1
hsa-miRPlus-E1093		1					2,5(0,022)	1					1			1		1		-1
hsa-miR-144/mmu-miR-144/rno-miR-144		1		1	2,4(0,046)	-1	3,5(0,01)	1		-1	-3,4(0,032)					-1	-1			-1
hsa-miRPlus-A1027	-2,3(0)	1	-0,8(0,021)		-0,6(0,004)		1,7(0,001)		0,8(0,021)		0,6(0,008)					1				-1
hsa-miR-1246	-2,1(0,001)	1					2,7(0,001)	1								1				-1
sv40-miR-S1-5p		1																		-1
hsa-miR-516a-5p					0,7(0,033)		1,5(0,001)				-0,7(0,041)							1
hsa-miRPlus-E1246				1							-1,2(0,045)					-1	-1						LS1	LS3	LS7	SH1	SH3	SH7
hsa-miR-1285					1,9(0,028)	-1					-1,8(0,029)						-1						15,28(6)	43,24(9)	203,16(13)	0,6(0)	0,2(0)	0,2(0)	CT
hsa-miRPlus-E1218											-1,8(0,049)						-1							0,23(0)	194,36(27)	0,6(0)	-	-	LS1
hsa-miRPlus-F1003											-2,3(0,03)						-1								0,8(0)	-	51,14(6)	-	LS3
hsa-miR-1280					1,8(0,04)	-1					-2,4(0,02)						-1									-	-	257,2(1)	LS7
hsa-miR-451/mmu-miR-451/rno-miR-451				1			3(0,036)	1		-1							-1										0,3(0)	0,1(0)	SH1
hsa-miR-486-5p				1			1,5(0,027)			-1							-1											0,0 (0)	SH3
hsa-miR-21/mmu-miR-21/rno-miR-21		1	-3(0)	1	-3,3(0,003)	1	-2,1(0,013)	-1	1,4(0,045)	-1	2,6(0,006)		1	1		-1
hsa-miR-142-5p/mmu-miR-142-5p/rno-miR-142-5p			-1,4(0,048)	1						-1						-1
hsa-miR-199a-5p				1	-1(0,015)	1	-1,1(0,012)	-1								-1
hsa-miR-1826								-1								-1
hsa-miR-17			-1,1(0,049)	1												-1
hsa-miR-936				1												-1
hsa-miR-1308		-1														-1
hsa-miRPlus-E1038																-1
U6-snRNA-1		1					1,7(0,016)	1					1			1
mmu-miR-665	-1,7(0,041)	1					1,8(0,012)						1			1
hsa-miR-215		1			0,8(0,018)		2,1(0,012)	1			-0,8(0,008)					1
hsa-miRPlus-E1005		1			1,4(0,031)		2,5(0,012)	1			-1,2(0,046)					1
hsa-miR-513a-5p		1					2,6(0,012)	1								1
hsa-miR-637	-1,7(0,017)	1					1,5(0,01)									1
hsa-miRPlus-F1024							1,6(0,029)									1
hsa-miR-602		1														1
hsa-miR-923							1,7(0,012)	1				-1		-1	-1
hsa-miR-136/mmu-miR-136/rno-miR-136							0,9(0,013)				-1,4(0,008)	1			1
hsa-miR-223/mmu-miR-223/rno-miR-223	-1,9(0,041)	1	-2,3(0,005)	1	-1,5(0,015)	1				-1			1
mmu-miR-215/rno-miR-215					0,4(0,028)		1(0,038)				-0,3(0,028)
hsa-miRPlus-A1031											0,3(0,037)
hsa-miR-96/mmu-miR-96/rno-miR-96			0,7(0,016)		0,6(0,011)				-0,6(0,02)		-0,3(0,044)
hsa-miR-218-2*/mmu-miR-218-2*/rno-miR-218*							0,6(0,034)				-0,4(0,033)
hsa-miRPlus-F1232					0,8(0,018)		1,1(0,012)				-0,4(0,033)
hsa-miR-1237											0,4(0,037)
hsa-miRPlus-E1225											0,4(0,044)
mmu-miR-468					0,8(0,017)		1(0,009)				-0,5(0,016)
kshv-miR-K12-8					0,8(0,015)		1(0,001)				-0,5(0,024)
hsa-miRPlus-E1232					1,2(0,018)		1,3(0,004)				-0,5(0,03)
mmu-miR-711	-1,2(0,031)	1	-0,5(0,048)				0,8(0,013)		0,4(0,02)		0,5(0,032)
ebv-miR-BART2-5p							-0,6(0,009)				0,5(0,032)
hcmv-miR-UL148D											0,5(0,032)
hsa-miRPlus-F1018					-0,5(0,03)		-0,8(0,013)	-1			0,5(0,033)
hsa-miR-1253					0,8(0,032)		1,3(0,005)				-0,5(0,035)
hsa-miR-1281								-1			0,5(0,038)
hsa-miR-1244											0,5(0,038)
hsa-miRPlus-F1055					1(0,046)		1(0,005)				-0,5(0,044)
mmu-miR-669e					0,9(0,013)		1,1(0,01)				-0,6(0,015)
hsa-miRPlus-F1215											0,6(0,018)
mmu-miR-294*					0,6(0,04)		1,2(0,001)				-0,6(0,019)
hsa-miRPlus-F1021					1(0,03)		1,4(0,005)				-0,6(0,021)
hsa-miRPlus-F1154											0,6(0,023)
hsa-miRPlus-F1193					0,7(0,018)		1,3(0,003)				-0,6(0,028)
hsa-miRPlus-F1063					1,1(0,028)		1,2(0,009)				-0,6(0,032)
hsa-miR-620					1(0,036)		1,3(0,006)				-0,6(0,037)
hsa-miRPlus-E1066					0,9(0,031)		1(0,011)				-0,6(0,042)
hsa-miRPlus-E1072					1,1(0,029)		1,2(0,005)				-0,6(0,042)
hsa-miR-374a											-0,6(0,042)
hsa-miR-1207-3p											0,7(0,015)
hsa-miRPlus-E1030					0,9(0,02)		1,3(0,002)				-0,7(0,015)
hsa-miR-30e*/mmu-miR-30e*/rno-miR-30e*			0,4(0,049)		0,4(0,036)				-0,5(0,019)		-0,7(0,017)
hsa-miRPlus-F1206					-0,6(0,035)						0,7(0,018)
hsa-miRPlus-E1212					0,9(0,01)		1,4(0,012)				-0,7(0,02)
hsa-miRPlus-F1070							-0,7(0,028)				0,7(0,022)
hsa-miR-300					1,3(0,012)		1,2(0,003)				-0,7(0,023)
hsa-miR-634											-0,7(0,023)
mmu-miR-466a-5p					1,1(0,008)		1,2(0,01)				-0,7(0,025)
hsa-miRPlus-E1082											0,7(0,029)
hsa-miRPlus-E1216					1(0,041)		1,1(0,002)				-0,7(0,029)
hsa-miRPlus-E1156											0,7(0,032)
hsa-miRPlus-E1116					1,2(0,031)		1(0,011)				-0,7(0,032)
hsa-miR-138/mmu-miR-138/rno-miR-138			1,2(0,045)		1,1(0,02)						-0,7(0,032)
mghv-miR-M1-2								-1			0,7(0,033)
mmu-miR-350/rno-miR-350											-0,7(0,036)
hsa-miR-642					0,7(0,028)		1,4(0,009)				-0,7(0,041)
hsa-miR-1297											-0,7(0,042)
hsa-miR-519c-5p/hsa-miR-519b-5p/hsa-miR-523*/hsa-miR-518e*/hsa-miR-522*/hsa-miR-519a*											-0,7(0,049)
mmu-miR-541/rno-miR-541					0,5(0,013)				-0,8(0,033)		-0,8(0,008)
hsa-miR-574-3p					1,1(0,013)		0,8(0,012)				-0,8(0,008)
hsa-miR-383			0,8(0,016)		0,6(0,01)				-1(0,004)		-0,8(0,009)
hsa-miR-369-5p/mmu-miR-369-5p/rno-miR-369-5p					0,4(0,044)				-0,5(0,016)		-0,8(0,011)
hsa-miRPlus-E1186					1,1(0,013)		1(0,003)				-0,8(0,012)
mmu-miR-466b-3-3p					1,2(0,019)		0,9(0,015)				-0,8(0,015)
mmu-miR-669h-3p					1,4(0,01)		1(0,011)				-0,8(0,015)
mmu-miR-467b*					1,4(0,008)		1(0,007)				-0,8(0,017)
hsa-miRPlus-E1077							1,3(0,05)				-0,8(0,018)
mmu-miR-382*					0,7(0,01)		0,4(0,011)				-0,8(0,019)
mmu-miR-466i					1,7(0,01)		1,2(0,01)				-0,8(0,019)
hsa-miRPlus-E1110					1,3(0,017)		1,4(0,005)				-0,8(0,02)
mmu-miR-467a*/mmu-miR-467d*					1,2(0,008)		0,9(0,008)				-0,8(0,022)
mmu-miR-669d					1,3(0,01)		1,4(0,012)				-0,8(0,022)
hsa-miR-183/mmu-miR-183/rno-miR-183					0,9(0,009)		0,5(0,035)				-0,8(0,023)
mmu-miR-883b-5p					0,8(0,02)		1,2(0,022)				-0,8(0,023)
hsa-miR-483-5p					0,9(0,044)		1,2(0,002)				-0,8(0,03)
hsa-miR-1249								-1			0,8(0,031)
hsa-miRPlus-F1163					-0,6(0,037)		-0,8(0,025)				0,8(0,037)
mmu-miR-290-5p/rno-miR-290							1(0,029)				-0,8(0,037)
hsa-miRPlus-E1151					1,7(0,018)		1,4(0,002)				-0,8(0,037)
mmu-miR-675-5p							1,4(0,01)				-0,8(0,037)
hsa-miRPlus-F1104											-0,8(0,042)
mmu-miR-455											-0,8(0,042)
mmu-miR-881*					1,2(0,012)		1,5(0,001)				-0,8(0,043)
hsa-miR-320b											-0,8(0,043)
hsa-miR-126*/mmu-miR-126-5p/rno-miR-126*					0,6(0,035)				-0,6(0,033)		-0,8(0,045)
hsa-miR-1284							1,4(0,013)				-0,8(0,05)
mmu-miR-669i					1,4(0,008)		1,1(0,012)				-0,9(0,014)
mmu-miR-300*/rno-miR-300-5p					1,2(0,008)		1,6(0,001)				-0,9(0,015)
hsa-miRPlus-E1051					-0,7(0,025)	1	-0,9(0,019)	-1			0,9(0,017)
hsa-miR-485-3p/mmu-miR-485*					0,9(0,026)		1,6(0,012)				-0,9(0,018)
hsa-miR-361-5p/mmu-miR-361/rno-miR-361											-0,9(0,019)
hsa-miR-551b/mmu-miR-551b/rno-miR-551b					0,9(0,035)		0,7(0,015)				-0,9(0,02)
mmu-miR-466d-3p					1,6(0,01)		1,2(0,008)				-0,9(0,02)
mmu-miR-297b-3p/mmu-miR-297a*/mmu-miR-297c*					1,7(0,01)		1,3(0,01)				-0,9(0,02)
hsa-miRPlus-E1098					1,4(0,013)		1,6(0,002)				-0,9(0,02)
mmu-miR-434-5p			0,8(0,016)		0,8(0,017)				-0,9(0,013)		-0,9(0,023)
mmu-miR-467e*					1,7(0,013)		1,3(0,012)				-0,9(0,027)
hsa-miRPlus-A1072					1,3(0,013)		1,6(0,001)				-0,9(0,032)
mmu-miR-883a-5p					1,6(0,018)		1,7(0,002)				-0,9(0,037)
hsa-miR-583					1,7(0,01)		1,5(0,001)				-0,9(0,038)
hsa-miRPlus-E1031											-0,9(0,039)
hsa-miR-942							-1,1(0,013)	-1			0,9(0,041)
hsa-miR-320c											-0,9(0,042)
hsa-miR-28-5p											-0,9(0,048)
hsa-miR-127-5p/mmu-miR-127*			0,6(0,031)		0,7(0,004)		0,3(0,044)		-0,8(0,02)		-1(0,008)
hsa-miR-133a/mmu-miR-133a/rno-miR-133a					0,6(0,036)				-0,8(0,015)		-1(0,012)
mmu-miR-33/rno-miR-33					0,4(0,048)						-1(0,017)
hsa-miR-212/mmu-miR-212/rno-miR-212					0,8(0,021)						-1(0,017)
hsa-miR-433/mmu-miR-433/rno-miR-433					0,6(0,017)				-0,6(0,02)		-1(0,018)
hsa-miR-411*/mmu-miR-411*			1,1(0,039)	-1	1,2(0,03)				-0,9(0,02)		-1(0,018)
hsa-miR-887											-1(0,019)
hsa-miR-331-3p/mmu-miR-331-3p/rno-miR-331					0,8(0,028)				-0,6(0,028)		-1(0,025)
mmu-miR-669f					1,5(0,01)		1,4(0,012)				-1(0,026)
U6B-5					0,9(0,037)		1,7(0,014)				-1(0,027)
mmu-miR-433*											-1(0,037)
hsa-miRPlus-F1225					1,6(0,013)		1,3(0,002)				-1(0,038)
U6-snRNA-2					1,1(0,041)		1,2(0,024)				-1(0,041)
hsa-miR-195/mmu-miR-195/rno-miR-195											-1(0,042)
hsa-miR-376a			0,7(0,008)		1,1(0,007)		0,8(0,012)		-0,7(0,013)		-1,1(0,008)
hsa-miR-495/mmu-miR-495/rno-miR-495					0,9(0,014)		0,6(0,01)		-0,7(0,02)		-1,1(0,008)
hsa-miR-381/mmu-miR-381/rno-miR-381					1,2(0,007)		1,2(0,005)				-1,1(0,009)
mmu-miR-330*/rno-miR-330*					1,1(0,007)		0,9(0,02)				-1,1(0,01)
hsa-miR-153/mmu-miR-153/rno-miR-153					0,9(0,008)						-1,1(0,01)
mmu-miR-483*/rno-miR-483					-0,8(0,019)		-1,2(0,009)	-1			1,1(0,012)
hsa-miR-382/mmu-miR-382/rno-miR-382					0,8(0,008)		0,8(0,01)		-0,7(0,025)		-1,1(0,014)
hsa-miR-379*			1(0,049)		1,1(0,021)				-0,9(0,021)		-1,1(0,014)
hsa-miRPlus-E1146					1,1(0,008)		0,8(0,022)				-1,1(0,015)
mmu-miR-107/rno-miR-107					1,2(0,019)						-1,1(0,015)
hsa-miR-32*					1,3(0,008)		1,5(0,009)				-1,1(0,017)
hsa-miRPlus-F1059	0,7(0,041)				1,5(0,008)		0,7(0,034)				-1,1(0,018)
hsa-miR-34a/mmu-miR-34a/rno-miR-34a			1(0,034)	-1	0,9(0,02)				-1,3(0,021)	1	-1,1(0,02)
hsa-miRPlus-C1115					1,3(0,021)		1,6(0,003)				-1,1(0,022)
mmu-miR-101b/rno-miR-101b											-1,1(0,023)
hsa-miR-181b											-1,1(0,024)
hsa-miRPlus-E1104					1,3(0,019)		1,9(0,001)				-1,1(0,025)
mmu-miR-466f-3p					1,7(0,01)		1,5(0,012)				-1,1(0,026)
mmu-miR-467g					1,6(0,01)		1,5(0,02)				-1,1(0,031)
hsa-miRPlus-F1187					1,5(0,015)		1,9(0,001)	1			-1,1(0,032)
mcmv-miR-m88-1											-1,1(0,032)
hsa-miR-519e*											-1,1(0,033)
hsa-miR-204/mmu-miR-204/rno-miR-204											-1,1(0,035)
mmu-miR-467f					1,8(0,01)		1,3(0,01)				-1,1(0,036)
hsa-miRPlus-E1117					1,1(0,028)		0,8(0,049)				-1,1(0,037)
hsa-miRPlus-F1164					1,1(0,032)						-1,1(0,037)
hsa-miR-597											-1,1(0,043)
hsa-miR-369-3p/mmu-miR-369-3p/rno-miR-369-3p			0,6(0,045)		1(0,004)		0,7(0,012)		-0,9(0,02)		-1,2(0,008)
hsa-miR-7/mmu-miR-7a/rno-miR-7a					1,1(0,008)		0,9(0,012)		-0,9(0,023)		-1,2(0,008)
rno-miR-383			0,9(0,016)		1,2(0,008)		0,9(0,017)		-1(0,013)		-1,2(0,008)
hsa-miR-34b/mmu-miR-34b-3p					1,3(0,015)		1,1(0,019)				-1,2(0,015)
hsa-miR-185/mmu-miR-185/rno-miR-185					1(0,018)						-1,2(0,015)
hsa-miR-1274b											-1,2(0,015)
hsa-miRPlus-F1166					1,5(0,01)		1,4(0,004)				-1,2(0,017)
hsa-miR-9*			0,7(0,044)		1,2(0,028)				-0,9(0,029)		-1,2(0,022)
hsa-miR-1282						1	-1,3(0,024)	-1			1,2(0,023)
rno-miR-204*					1,6(0,019)		2(0,005)				-1,2(0,023)
hsa-miR-320d											-1,2(0,024)
hsa-miRPlus-A1083											-1,2(0,025)
hsa-miRPlus-F1066					1,8(0,017)		1,7(0,002)				-1,2(0,032)
hsa-miR-191/mmu-miR-191/rno-miR-191											-1,2(0,032)
hsa-miRPlus-F1147											-1,2(0,036)
hsa-miRPlus-F1086					1,5(0,017)		2,1(0,002)	1			-1,2(0,042)
hsa-miR-340					1(0,044)						-1,2(0,042)
hsa-miR-126/mmu-miR-126-3p/rno-miR-126					1,3(0,038)						-1,2(0,042)
mmu-miR-23b/rno-miR-23b											-1,2(0,043)
mmu-miR-136*					0,7(0,018)		0,5(0,038)		-0,9(0,033)		-1,3(0,008)
hsa-miR-107					0,8(0,02)						-1,3(0,014)
mmu-miR-129-3p/rno-miR-129*					1,1(0,017)						-1,3(0,015)
hsa-miRPlus-B1114					1,5(0,021)		2,1(0,002)				-1,3(0,017)
hsa-miR-342-3p/mmu-miR-342-3p/rno-miR-342-3p					1(0,027)						-1,3(0,019)
mmu-miR-340-5p/rno-miR-340-5p					1(0,034)						-1,3(0,02)
mmu-miR-325/rno-miR-325-3p					1,3(0,03)						-1,3(0,023)
hsa-let-7i/mmu-let-7i/rno-let-7i											-1,3(0,027)
hsa-miRPlus-F1222											-1,3(0,027)
hsa-miRPlus-E1114							1,2(0,048)				-1,3(0,028)
hsa-miR-765					2,1(0,018)		1,7(0,001)				-1,3(0,029)
hsa-miRPlus-E1075					1,4(0,017)		2(0,001)				-1,3(0,029)
hsa-miRPlus-D1116					1,9(0,02)		1,8(0,005)				-1,3(0,032)
hsa-miR-99b/mmu-miR-99b/rno-miR-99b					1,1(0,036)						-1,3(0,032)
hsa-miR-145/mmu-miR-145/rno-miR-145					1,1(0,045)						-1,3(0,032)
hsa-miR-939							1,3(0,035)				-1,3(0,035)
mmu-miR-9*/rno-miR-9*			1,1(0,04)		1,1(0,041)				-1,2(0,02)		-1,3(0,037)
mmu-miR-667					1,5(0,03)		1,2(0,05)				-1,3(0,037)
hsa-let-7b/mmu-let-7b/rno-let-7b											-1,3(0,037)
hsa-miR-99a/mmu-miR-99a/rno-miR-99a											-1,3(0,037)
hsa-miRPlus-F1216					1,6(0,019)		1,7(0,005)				-1,3(0,044)
mmu-miR-341/rno-miR-341					0,9(0,007)		0,7(0,009)		-0,7(0,026)		-1,4(0,001)
hsa-miR-133b			0,6(0,048)		1(0,012)		0,9(0,01)		-0,8(0,02)		-1,4(0,008)
hsa-miR-128/mmu-miR-128/rno-miR-128			0,7(0,049)		1,2(0,008)				-1(0,02)		-1,4(0,008)
hsa-miR-182/mmu-miR-182/rno-miR-182			0,9(0,016)		1,4(0,007)		0,9(0,024)		-0,9(0,02)		-1,4(0,012)
hsa-miR-411/mmu-miR-411/rno-miR-411			1(0,003)		1,1(0,01)				-1,2(0,013)		-1,4(0,017)
hsa-miR-26a/mmu-miR-26a/rno-miR-26a					1(0,031)						-1,4(0,017)
hsa-miR-103/mmu-miR-103/rno-miR-103											-1,4(0,017)
hsa-miR-491-3p					1,2(0,04)						-1,4(0,022)
hsa-miR-125b/mmu-miR-125b-5p/rno-miR-125b-5p					1,3(0,026)						-1,4(0,025)
hsa-miR-30d/mmu-miR-30d/rno-miR-30d											-1,4(0,037)
hsa-miR-888*											-1,4(0,037)
hsa-miR-1/mmu-miR-1			1(0,039)		1,2(0,01)				-0,8(0,02)		-1,5(0,008)
hsa-miR-379/mmu-miR-379/rno-miR-379			0,8(0,016)		1,3(0,007)				-1(0,013)		-1,5(0,008)
hsa-miR-190/mmu-miR-190/rno-miR-190			0,7(0,049)		1,4(0,023)				-0,6(0,02)		-1,5(0,015)
hsa-miR-26b/mmu-miR-26b/rno-miR-26b					1,2(0,019)						-1,5(0,015)
hsa-miR-708/mmu-miR-708/rno-miR-708			0,8(0,04)		1,3(0,02)						-1,5(0,015)
hsa-miR-1260											-1,5(0,016)
hsa-miR-519d											-1,5(0,017)
hsa-miR-744/mmu-miR-744					1,4(0,02)						-1,5(0,018)
hsa-miR-135a/mmu-miR-135a/rno-miR-135a									-1,2(0,02)	1	-1,5(0,03)
hsa-miR-29a/mmu-miR-29a/rno-miR-29a					1,3(0,049)				-0,8(0,016)		-1,5(0,04)
mmu-miR-300/rno-miR-300-3p			0,5(0,049)		1,4(0,007)		1,2(0,01)		-0,7(0,032)		-1,6(0,008)
mmu-miR-329/rno-miR-329	0,7(0,041)		1(0,048)		1,6(0,007)		0,9(0,012)				-1,6(0,008)
hsa-miR-338-5p/mmu-miR-338-5p/rno-miR-338*					1,3(0,012)		1,2(0,03)				-1,6(0,008)
hsa-miR-98/mmu-miR-98/rno-miR-98					1,2(0,037)						-1,6(0,015)
mmu-miR-384-3p/rno-miR-384-3p			0,8(0,04)		1,4(0,01)						-1,6(0,015)
hsa-miR-138-1*/mmu-miR-138*/rno-miR-138*					1,4(0,014)		0,8(0,047)				-1,6(0,017)
hsa-miR-10a/mmu-miR-10a/rno-miR-10a-5p					1,3(0,035)						-1,6(0,023)
hsa-miR-33a					1,1(0,015)		1,3(0,014)				-1,7(0,008)
mmu-miR-376b/rno-miR-376b-3p			0,8(0,048)		1,6(0,007)		1,1(0,024)		-0,7(0,049)		-1,7(0,009)
mmu-miR-181b/rno-miR-181b					1,5(0,026)		1(0,048)				-1,7(0,01)
hsa-miR-30a/mmu-miR-30a/rno-miR-30a					1,2(0,036)						-1,7(0,019)
hsa-let-7f/mmu-let-7f/rno-let-7f					1,2(0,042)						-1,7(0,019)
hsa-let-7c/mmu-let-7c/rno-let-7c											-1,7(0,022)
hsa-miR-9/mmu-miR-9/rno-miR-9			0,7(0,049)						-1,1(0,02)		-1,7(0,036)
hsa-miR-129-3p					1,5(0,016)					1	-1,8(0,014)
hsa-miR-30c/mmu-miR-30c/rno-miR-30c					1,7(0,016)						-1,8(0,015)
hsa-miR-487b/mmu-miR-487b/rno-miR-487b					1,4(0,021)						-1,8(0,017)
hsa-miRPlus-E1033											-1,8(0,02)
hsa-miR-30e/mmu-miR-30e/rno-miR-30e											-1,8(0,037)
hsa-miR-218/mmu-miR-218/rno-miR-218			0,8(0,048)		1,3(0,019)				-1(0,015)	1	-1,9(0,008)
mmu-miR-376a/rno-miR-376a			1,1(0,021)		1,8(0,007)		1,2(0,029)		-1(0,02)		-1,9(0,008)
hsa-miR-127-3p/mmu-miR-127/rno-miR-127			0,9(0,039)		1,3(0,008)				-1,2(0,019)		-1,9(0,01)
hsa-miR-335/mmu-miR-335-5p/rno-miR-335			1(0,016)	-1	1,7(0,01)				-1,1(0,026)		-1,9(0,014)
hsa-miR-100/mmu-miR-100/rno-miR-100					1,8(0,019)						-1,9(0,016)
hsa-let-7e/mmu-let-7e/rno-let-7e					1,5(0,026)						-1,9(0,017)
hsa-miR-1264					1,7(0,049)						-1,9(0,02)
hsa-miR-101/mmu-miR-101a/rno-miR-101a											-1,9(0,023)
mmu-let-7a/rno-let-7a											-1,9(0,023)
hsa-miR-136*/rno-miR-136*					1,3(0,015)		1,1(0,041)		-0,9(0,028)		-2(0,008)
hsa-miR-129*					1,6(0,015)					1	-2(0,014)
hsa-miR-1274a					1,4(0,026)						-2(0,014)
hsa-let-7g/mmu-let-7g					2(0,013)						-2(0,014)
hsa-let-7d/mmu-let-7d/rno-let-7d											-2(0,017)
hsa-miR-30b/mmu-miR-30b/rno-miR-30b-5p											-2(0,029)
hsa-miRPlus-E1013											-2(0,036)
hsa-miR-29c/mmu-miR-29c/rno-miR-29c									-1,1(0,004)		-2(0,041)
hsa-miR-494/mmu-miR-494/rno-miR-494							1,8(0,049)				-2(0,042)
hsa-miR-125a-5p/mmu-miR-125a-5p/rno-miR-125a-5p					1,9(0,015)						-2,1(0,015)
hsa-let-7a					1,7(0,037)						-2,1(0,018)
mmu-miR-207/rno-miR-207					1,5(0,04)						-2,1(0,022)
hsa-miR-338-3p/mmu-miR-338-3p/rno-miR-338					1,3(0,02)		1,4(0,023)				-2,2(0,008)
rno-miR-352											-2,2(0,019)
hsa-miR-933					2,1(0,039)						-2,2(0,023)
hsa-miR-124/mmu-miR-124/rno-miR-124			1,2(0,018)	-1	2,2(0,008)	-1	1,6(0,034)		-1,5(0,02)	1	-2,4(0,008)
mmu-miR-434-3p/rno-miR-434			1(0,048)	-1	2,3(0,01)	-1	1,9(0,032)		-1,2(0,025)	1	-2,4(0,01)
hsa-miR-219-2-3p/rno-miR-219-2-3p					1,6(0,037)						-2,4(0,016)
hsa-miR-10b/mmu-miR-10b/rno-miR-10b					2,1(0,018)				-1(0,049)		-2,4(0,017)
hsa-miR-181a/mmu-miR-181a/rno-miR-181a					1,7(0,047)						-2,6(0,023)
hsa-miR-219-5p/mmu-miR-219/rno-miR-219-5p					2,4(0,016)	-1					-2,7(0,015)
hsa-miR-142-3p/mmu-miR-142-3p/rno-miR-142-3p		1	-1,4(0,028)	1		1				-1
mmu-miR-696							-0,5(0,012)	-1	0,4(0,021)
hsa-miR-29b/mmu-miR-29b/rno-miR-29b									-0,9(0,025)
ebv-miR-BART8*	-0,9(0,044)	1					1,4(0,006)		0,9(0,037)
hsa-miR-335*/mmu-miR-335-3p							-0,6(0,022)	-1
mmu-miR-199a-5p/rno-miR-199a-5p					-0,7(0,033)	1	-0,7(0,028)	-1
hsa_SNORD15A							-0,8(0,009)	-1
mmu-miR-199b*							-0,8(0,028)	-1
hsa-miR-146a/mmu-miR-146a/rno-miR-146a					-0,9(0,028)	1	-0,9(0,015)	-1
hsa-miR-105						1		-1
hsa-miR-378/mmu-miR-378/rno-miR-378								-1
hsa-miR-493*								-1
hsa-miRPlus-E1016								-1
hsa-miRPlus-E1078								-1
hsa-miRPlus-F1029		1			1,1(0,032)		1,9(0,001)	1
mmu-miR-882					1,2(0,017)		2(0,001)	1
mmu-miR-466g							0,2(0,044)
mmu-miR-669c							0,4(0,017)
mmu-miR-705							0,4(0,038)
hsa-miR-1261							0,5(0,013)
mmu-miR-486				1			0,5(0,014)
hsa-miR-25*							0,7(0,005)
rno-miR-466c					0,7(0,013)		0,7(0,011)
hsa-miRPlus-E1039							0,7(0,014)
hsa-miR-1255a							0,7(0,015)
mghv-miR-M1-3							0,7(0,017)
hsa-miRPlus-E1097							0,7(0,019)
hsa-miR-630							0,7(0,026)
hsa-miR-920							0,7(0,033)
mmu-miR-1196							0,7(0,034)
mmu-miR-466e-5p							0,7(0,047)
mmu-miR-710	-0,6(0,041)						0,8(0,006)
hsa-miRPlus-E1045							0,8(0,006)
hsa-miR-638	-1(0,016)	1					0,8(0,009)
hsa-miRPlus-F1205							0,8(0,011)
hsa-miR-1252					0,7(0,033)		0,8(0,013)
hsa-miR-184/mmu-miR-184/rno-miR-184					0,9(0,026)		0,8(0,013)
hsa-miR-519e					0,9(0,019)		0,8(0,014)
hsa-miR-1290							0,8(0,017)
mmu-miR-1187					0,6(0,035)		0,8(0,02)
hsa-miR-509-5p					0,8(0,012)		0,9(0,007)
mmu-miR-466d-5p					0,7(0,015)		0,9(0,013)
mmu-miR-685		1					0,9(0,013)
hsa-miR-144*				1			0,9(0,014)
hsa-miRPlus-F1042							0,9(0,018)
mmu-miR-30b*/rno-miR-30b-3p							0,9(0,038)
mmu-miR-693-5p					0,9(0,043)		1(0,007)
hsa-miRPlus-E1185							1(0,009)
rno-miR-466b					0,5(0,031)		1(0,013)
ebv-miR-BART6-3p		1					1(0,013)
hsa-miR-149*	-0,5(0,041)						1(0,046)
hsa-miR-934							1(0,049)
hsa-miRPlus-A1056	-0,9(0,017)						1,1(0,001)
hsa-miRPlus-E1015					1(0,026)		1,1(0,002)
hsa-miRPlus-F1017					0,7(0,038)		1,1(0,013)
hsa-miR-576-3p							1,1(0,015)
hsa-miRPlus-E1200							1,1(0,015)
mmu-miR-466a-3p/mmu-miR-466b-3p/mmu-miR-466c-3p/mmu-miR-466e-3p							1,1(0,033)
kshv-miR-K12-6-3p		1					1,2(0,022)
hsa-miR-183*/mmu-miR-183*							1,2(0,036)
mmu-miR-21*/rno-miR-21*	-1,6(0,013)	1					1,3(0,012)
mmu-miR-1192					1,8(0,014)	-1	1,3(0,014)
hsa-miR-665							1,4(0,015)
hsa-miRPlus-F1239							1,5(0,012)
hsa_SNORD3@							1,6(0,004)
hsa-miR-498	-1,1(0,013)	1					1,6(0,005)
hsa-miR-1275							1,7(0,002)
hsa-miR-376a*					0,5(0,04)
hsa-miR-148b/mmu-miR-148b/rno-miR-148b-3p					0,5(0,045)
hsa-miR-149/mmu-miR-149					0,7(0,045)
hsa-miRPlus-E1100					0,8(0,03)
hsa-miR-589					0,8(0,045)
hsa-miR-1827					1(0,045)
hsa-miR-193a-3p/mmu-miR-193/rno-miR-193			-0,8(0,011)	1
mmu-miR-20a/rno-miR-20a			-1(0,049)	1
hsa-miR-18a			-1,3(0,049)	1
hsa-miR-106a				1
hsa-miR-15b/mmu-miR-15b/rno-miR-15b				1
mmu-miR-17/rno-miR-17-5p/rno-miR-17				1
hsa-miRPlus-E1027		1
hsa-miRPlus-E1285		1

## Sheet: common to BH & RP
	CTvsLS1		CTvsLS3		CTvsLS7		LS1vsLS7		SH3vsLS3		SH7vsLS7
miRNA	BH	RP	BH	RP	BH	RP	BH	RP	BH	RP	BH	RP
ebv-miR-BART8*	-0,9(0,044)	-1
hsa-miR-17			-1,1(0,049)	-1
hsa-miR-18a			-1,3(0,049)	-1
mmu-miR-20a/rno-miR-20a			-1(0,049)	-1
hsa-miR-21/mmu-miR-21/rno-miR-21			-3(0)	-1	-3,3(0,003)	-1	-2,1(0,013)	-1	-1,4(0,045)	-1
mmu-miR-21*/rno-miR-21*	-1,6(0,013)	-1
hsa-miR-34a/mmu-miR-34a/rno-miR-34a			1(0,034)	1					1,3(0,021)	1
hsa-miR-124/mmu-miR-124/rno-miR-124			1,2(0,018)	1	2,2(0,008)	1			1,5(0,02)	1
hsa-miR-135a/mmu-miR-135a/rno-miR-135a									1,2(0,02)	1
hsa-miR-136/mmu-miR-136/rno-miR-136											1,4(0,008)	1
hsa-miR-142-3p/mmu-miR-142-3p/rno-miR-142-3p			-1,4(0,028)	-1
hsa-miR-142-5p/mmu-miR-142-5p/rno-miR-142-5p			-1,4(0,048)	-1
hsa-miR-144/mmu-miR-144/rno-miR-144					2,4(0,046)	1	3,5(0,01)	1
hsa-miR-146a/mmu-miR-146a/rno-miR-146a					-0,9(0,028)	-1	-0,9(0,015)	-1
hsa-miR-193a-3p/mmu-miR-193/rno-miR-193			-0,8(0,011)	-1
mmu-miR-199a-5p/rno-miR-199a-5p					-0,7(0,033)	-1	-0,7(0,028)	-1
mmu-miR-199b*							-0,8(0,028)	-1
hsa-miR-215							2,1(0,012)	1
hsa-miR-218/mmu-miR-218/rno-miR-218									1(0,015)	1
hsa-miR-219-5p/mmu-miR-219/rno-miR-219-5p					2,4(0,016)	1
hsa-miR-223/mmu-miR-223/rno-miR-223	-1,9(0,041)	-1	-2,3(0,005)	-1	-1,5(0,015)	-1
hsa-miR-335*/mmu-miR-335-3p			1(0,016)	1			-0,6(0,022)	-1
hsa-miR-335/mmu-miR-335-5p/rno-miR-335
hsa-miR-411*/mmu-miR-411*			1,1(0,039)	1
mmu-miR-434-3p/rno-miR-434			1(0,048)	1	2,3(0,01)	1			1,2(0,025)	1
hsa-miR-451/mmu-miR-451/rno-miR-451							3(0,036)	1
mmu-miR-483*/rno-miR-483							-1,2(0,009)	-1
hsa-miR-498	-1,1(0,013)	-1
hsa-miR-513a-5p							2,6(0,012)	1
hsa-miR-637	-1,7(0,017)	-1
hsa-miR-638	-1(0,016)	-1
mmu-miR-665	-1,7(0,041)	-1
mmu-miR-696							-0,5(0,012)	-1
mmu-miR-711	-1,2(0,031)	-1
mmu-miR-882							2(0,001)	1
hsa-miR-923							1,7(0,012)	1
hsa-miR-942							-1,1(0,013)	-1
mmu-miR-1192					1,8(0,014)	1
hsa-miR-1246	-2,1(0,001)	-1					2,7(0,001)	1
hsa-miR-1280					1,8(0,04)	1
hsa-miR-1282							-1,3(0,024)	-1
hsa-miR-1285					1,9(0,028)	1
hsa-miRPlus-A1027	-2,3(0)	-1
hsa-miRPlus-E1005							2,5(0,012)	1
hsa-miRPlus-E1051					-0,7(0,025)	-1	-0,9(0,019)	-1
hsa-miRPlus-E1093							2,5(0,022)	1
hsa-miRPlus-F1018							-0,8(0,013)	-1
hsa-miRPlus-F1029							1,9(0,001)	1
hsa-miRPlus-F1086							2,1(0,002)	1
hsa-miRPlus-F1170							2,3(0,005)	1
hsa-miRPlus-F1187							1,9(0,001)	1
hsa_SNORD15A							-0,8(0,009)	-1
U6-snRNA-1							1,7(0,016)	1
